# Supplementary material
Source: PubMed Central journal article supplement (PMC4378163)
Supplement: supp_pp.114.254342_254342Figure_S2b.pdf [file supp_pp.114.254342_254342Figure_S2b.pdf]

Figure S2

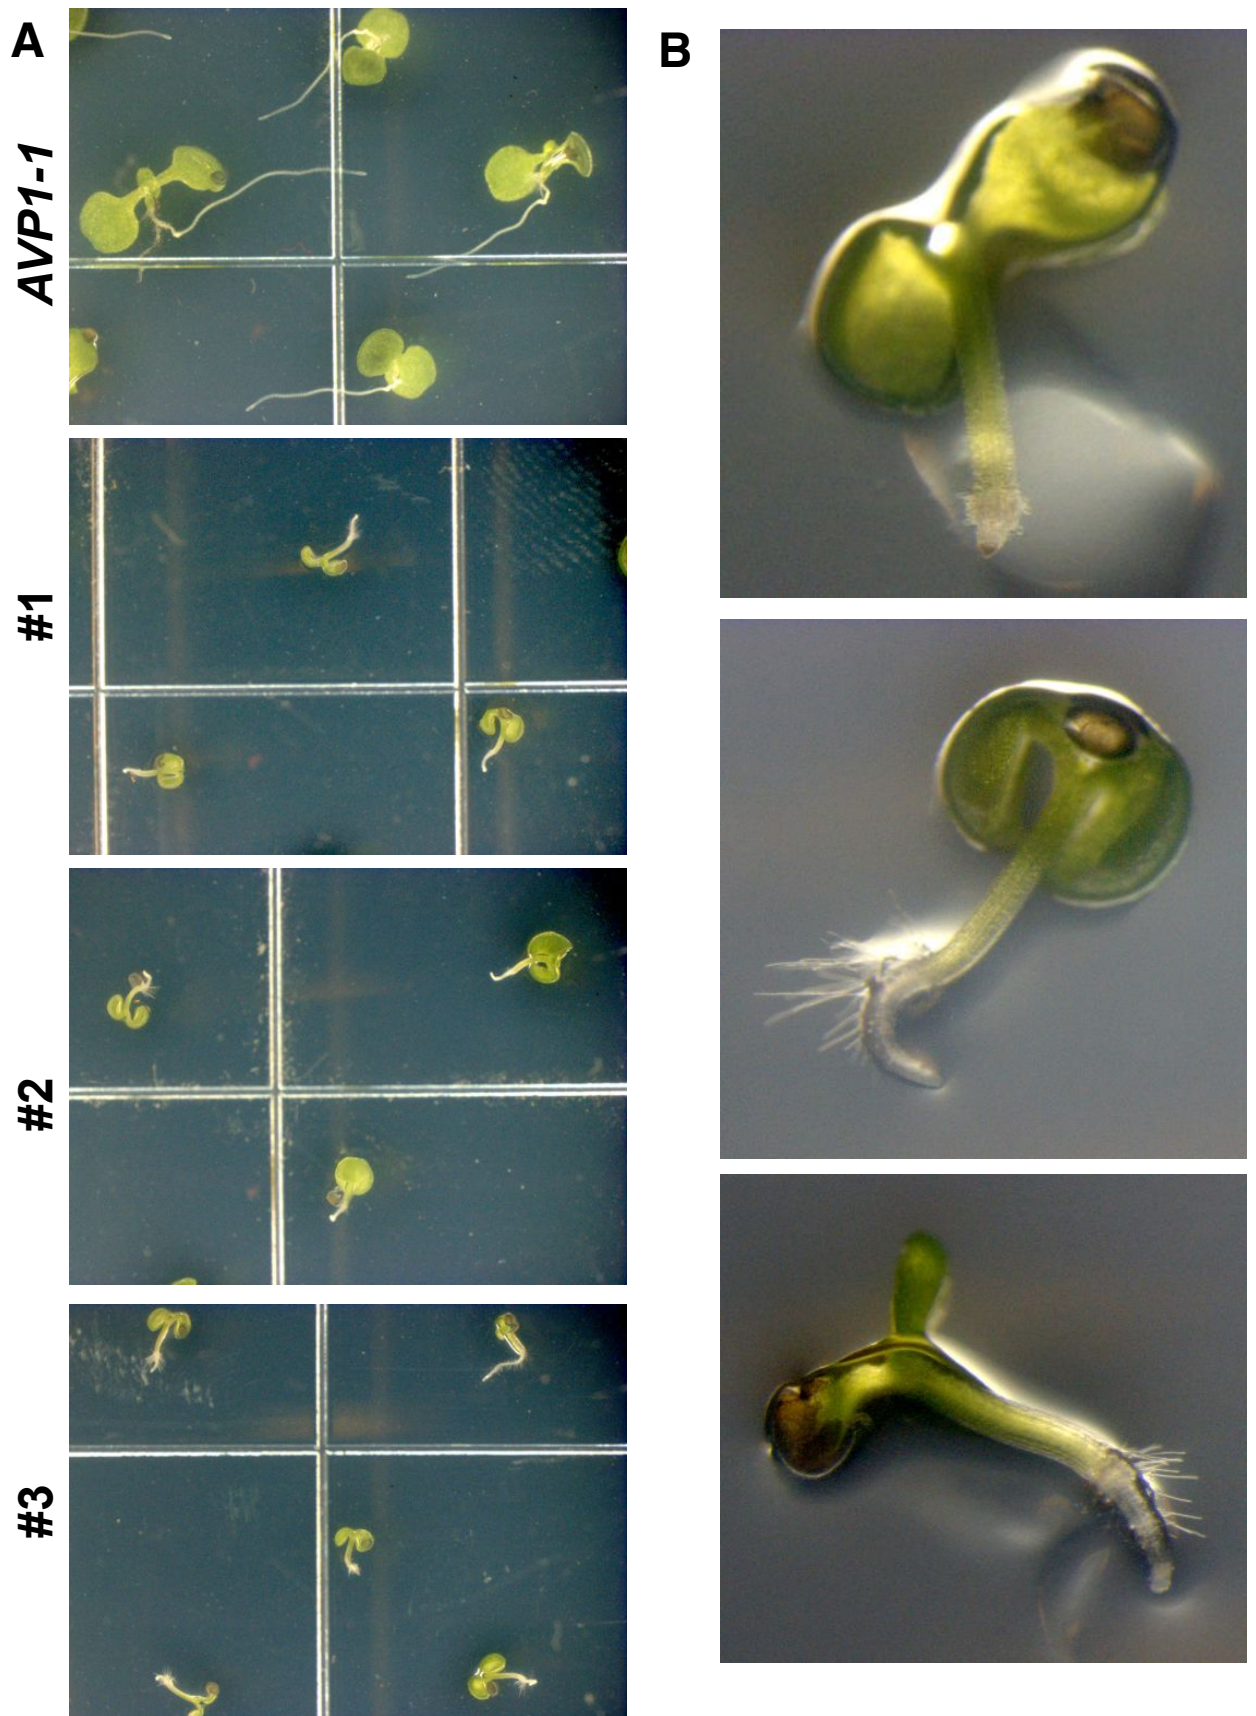

**Figure S2. Phloem-specific *AVP1* silencing in *AVP1-1* plants.** . A, *AVP1-1* and *pCoYMV::<sub>RNAi</sub>AVP1* T2 lines (#1, #2 and #3) grown in the absence of sucrose for 15 days under 12:12 day/night regimen. B, Details of representative *pCoYMV::<sub>RNAi</sub>AVP1* T2 lines showing different grades of impaired root growth.
