# Supplementary material
Source: PubMed Central journal article supplement (PMC4378163)
Supplement: supp_pp.114.254342_254342revFigure_S3_new.pdf [file supp_pp.114.254342_254342revFigure_S3_new.pdf]

Figure S3

- 244(pAVP1)

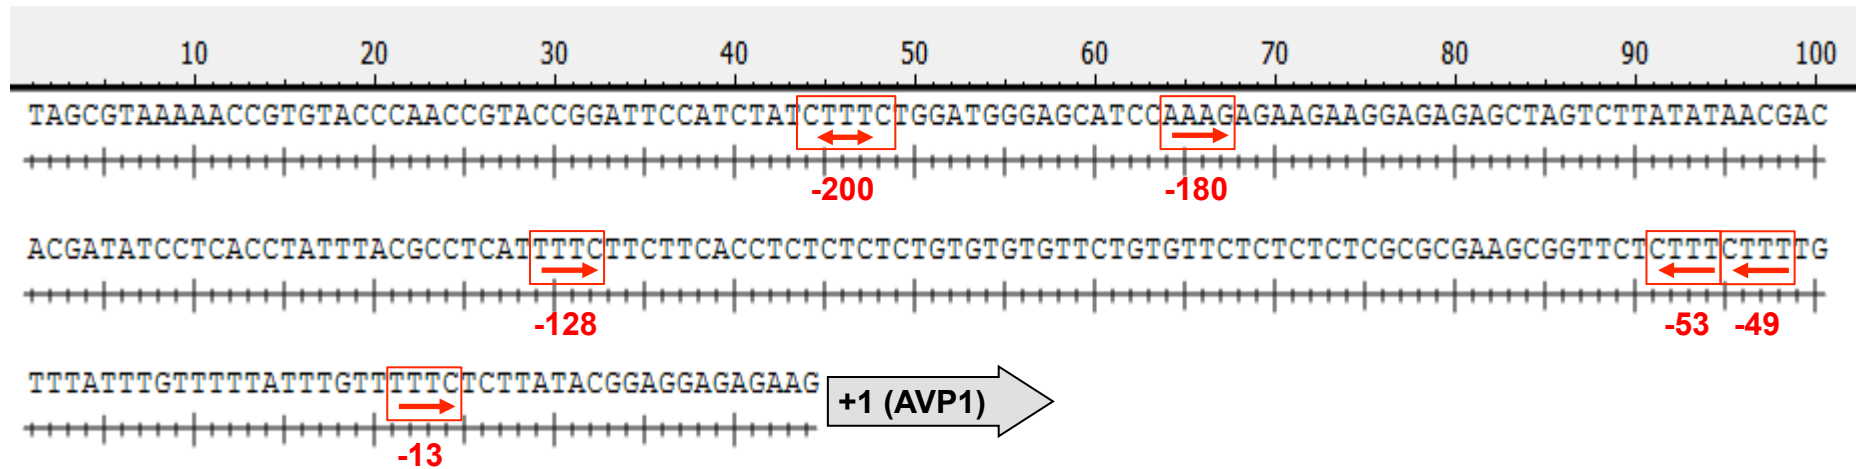

**Figure S3. Putative DOF2 core binding sites present in the 244 bp AVP1 promoter sequence.** Visual analysis of -244AVP1 promoter reveal six core sequences of DNA-binding One Zinc Finger element (DOF2; AAAG or CTTT). Red Box: core DOF2 location; Red arrow: core DOF2 orientation.
