# Supplementary material
Source: PubMed Central journal article supplement (PMC4378163)
Supplement: supp_pp.114.254342_254342revFigure_S5_new.pdf [file supp_pp.114.254342_254342revFigure_S5_new.pdf]

Figure S5

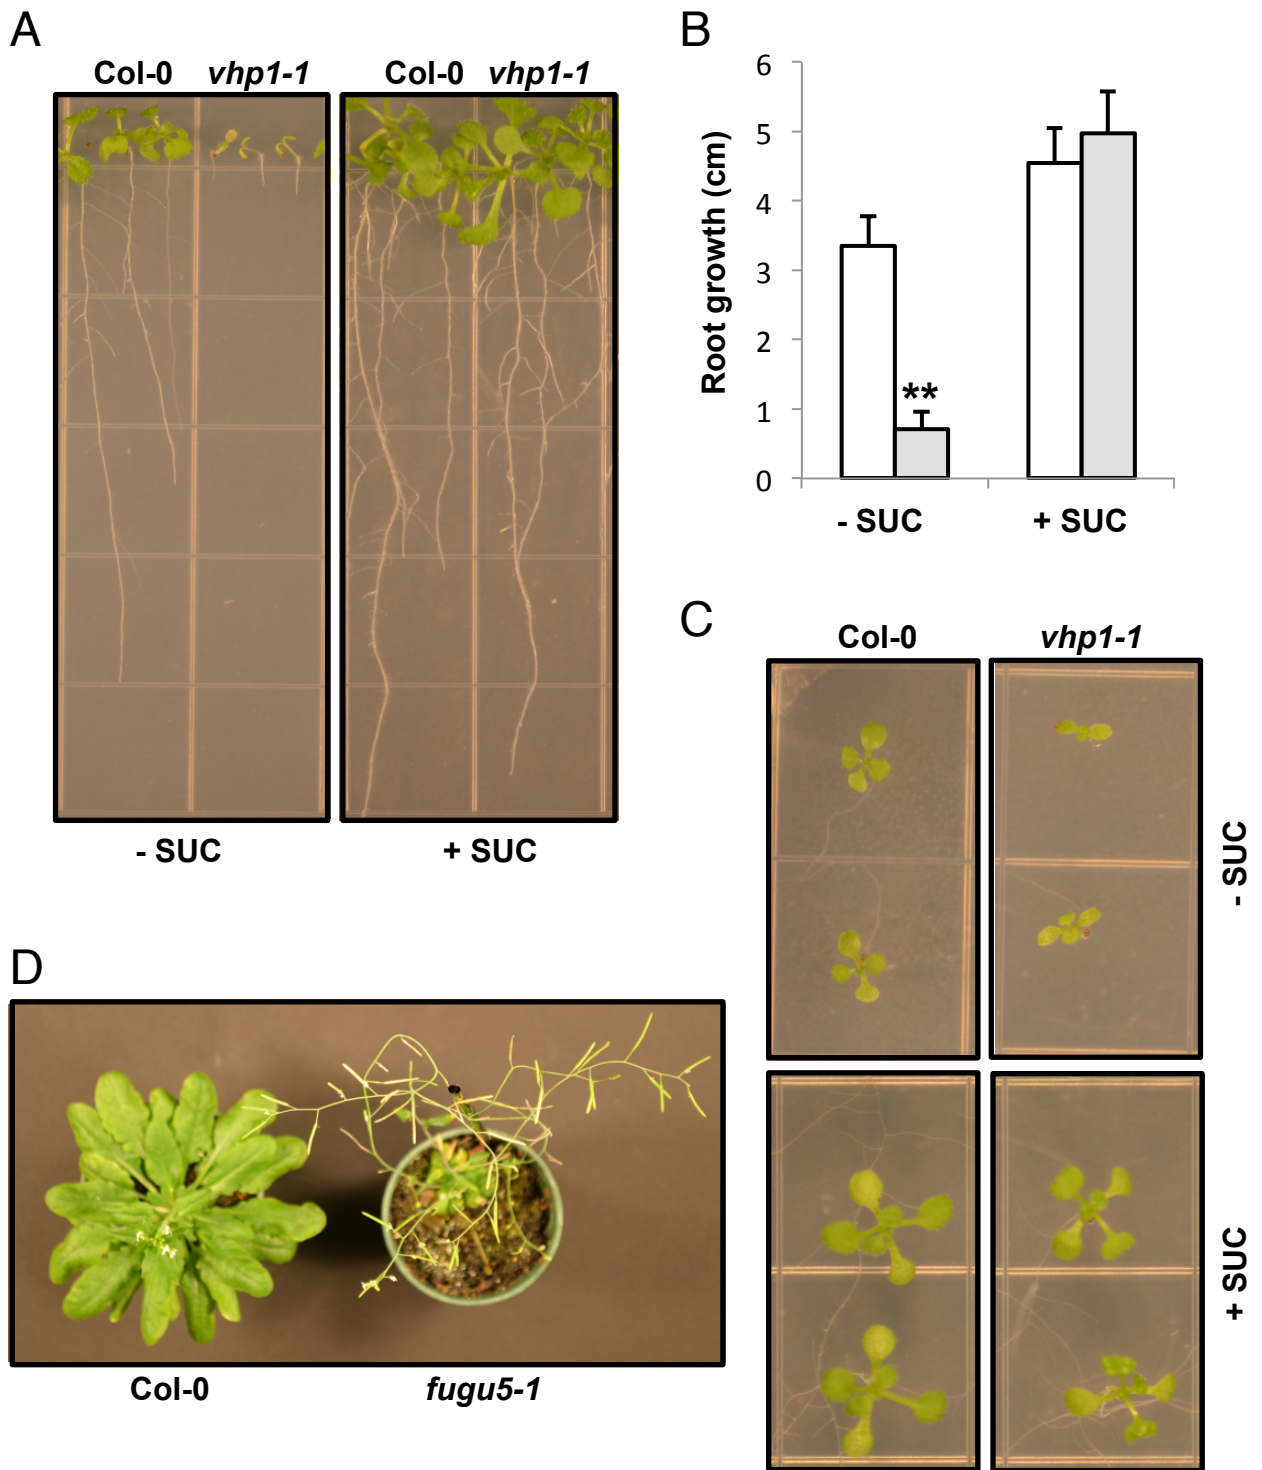

**Figure S5. Comparative growth phenotypes of Col-0 and *AVP1* mutants.** A, Root growth of 15 days old Col-0 and *vhp1-1* with and without sucrose. B, Measurements of roots from A (means  $\pm$  SE: n = 6 per line). C, Shoot growth of 15 days old representative Col-0 and *vhp1-1* lines with and without sucrose. D, Representative Col-0 and *fugu5-1* plants grown for 60 days in soil. All experiments were done under a 12:12 day:night cycle. Significant difference, relative to the wild type (Col-0), is based on Student's t-test and is shown as: \*\* $P \leq 0.01$ .
