# Supplementary material
Source: PubMed Central journal article supplement (PMC4378163)
Supplement: supp_pp.114.254342_254342table_S1.pdf [file supp_pp.114.254342_254342table_S1.pdf]

Table S1. List of primers

| name                  | orientation | primer sequence                                   | Amplicon size (bp) | purpose |
|-----------------------|-------------|---------------------------------------------------|--------------------|---------|
| KUP2<br>(At2g40540)   | forward     | GATACCTCGTGGGTCGTGTT                              | 182                | RT-PCR  |
|                       | reverse     | ACGAGCGTTGTCGTCTTCTT                              |                    |         |
| NRT2.1<br>(At1g08090) | forward     | AACAAGGGCTAACGTGGATG                              | 167                | RT-PCR  |
|                       | reverse     | CTGCTTCTCCTGCTCATTCC                              |                    |         |
| NRT2.4<br>(At5g60770) | forward     | GAACAAGGGCTGACATGGAT                              | 240                | RT-PCR  |
|                       | reverse     | AGAAGCCACGCGCCGTCCAC                              |                    |         |
| PHT1.4<br>(At2g38940) | forward     | CCCAATGCTACAACCTTCGT                              | 168                | RT-PCR  |
|                       | reverse     | GTATCCTGCGTCGGTCTTGT                              |                    |         |
| CLH1<br>(At4g24550)   | forward     | AGCATACTGCGTGCAAAG                                | 195                | RT-PCR  |
|                       | reverse     | TCGCCTGTGTCACATATCTC                              |                    |         |
| GAPDH3<br>(AT1g13440) | forward     | TTGGTGACAACAGGTCAAGCA                             | 62                 | RT-PCR  |
|                       | reverse     | AACTTGTGCGCTCAATGCAATC                            |                    |         |
| AtSUC2<br>(AT1g22710) | forward     | TAGCCATTGTCGTCCCTCAGATG                           | 189                | RT-PCR  |
|                       | reverse     | ATGAAATCCCATAGTAGCTTTGAAGG                        |                    |         |
| AVP1<br>(At1g15690)   | forward     | GCCCTAGTCTCCTTGGCTCT                              | 161                | RT-PCR  |
|                       | reverse     | AGAGCTGCACTTCCCACACT                              |                    |         |
| UBQ10<br>(At4g05320)  | forward     | GGCCTTGATAATCCCTGATGAATAAG                        | 61                 | RT-PCR  |
|                       | reverse     | AAAGAGATAACAGGAACGGAAACATAGT                      |                    |         |
| T-DNA<br>(SALK046492) | forward     | CCCATTTGGACGTGAATGTAGACAC (P1f)                   | PCR (P1)           |         |
| AVP1-exon1            | reverse     | ATCACCGTATCCATTCTTCC (P1r)                        |                    |         |
| pCoYMV                | forward     | CCATCGATTTCTTAGGGGCTTCTCTC (P2f)                  | PCR (P2)           |         |
|                       | reverse     | CGGGATCCTTGTTGTGTTGGTTTTTC (P2r)                  |                    |         |
| ppa<br><i>E. coli</i> | forward     | NcoI - TGCC <u>CCATGGG</u> CTTACTCAACGTCCC (P3f)  | PCR (P3)           |         |
|                       | reverse     | SmaI - TGCAC <u>CCCGGG</u> TATTTATTCTTGGCGC (P3r) |                    |         |
